# Supplementary material for: The Giardial Arginine Deiminase Participates in Giardia-Host Immunomodulation in a Structure-Dependent Fashion via Toll-like Receptors
Source: MDPI journal article supplement (doi:10.3390/ijms231911552), 2022-09-30
Supplement: s1 [file s1]

The giardial arginine deiminase participates in *Giardia*-host immunomodulation in a structure-dependent fashion via Toll-Like Receptors.  
 Fernández-Lainez, F., *et al.*

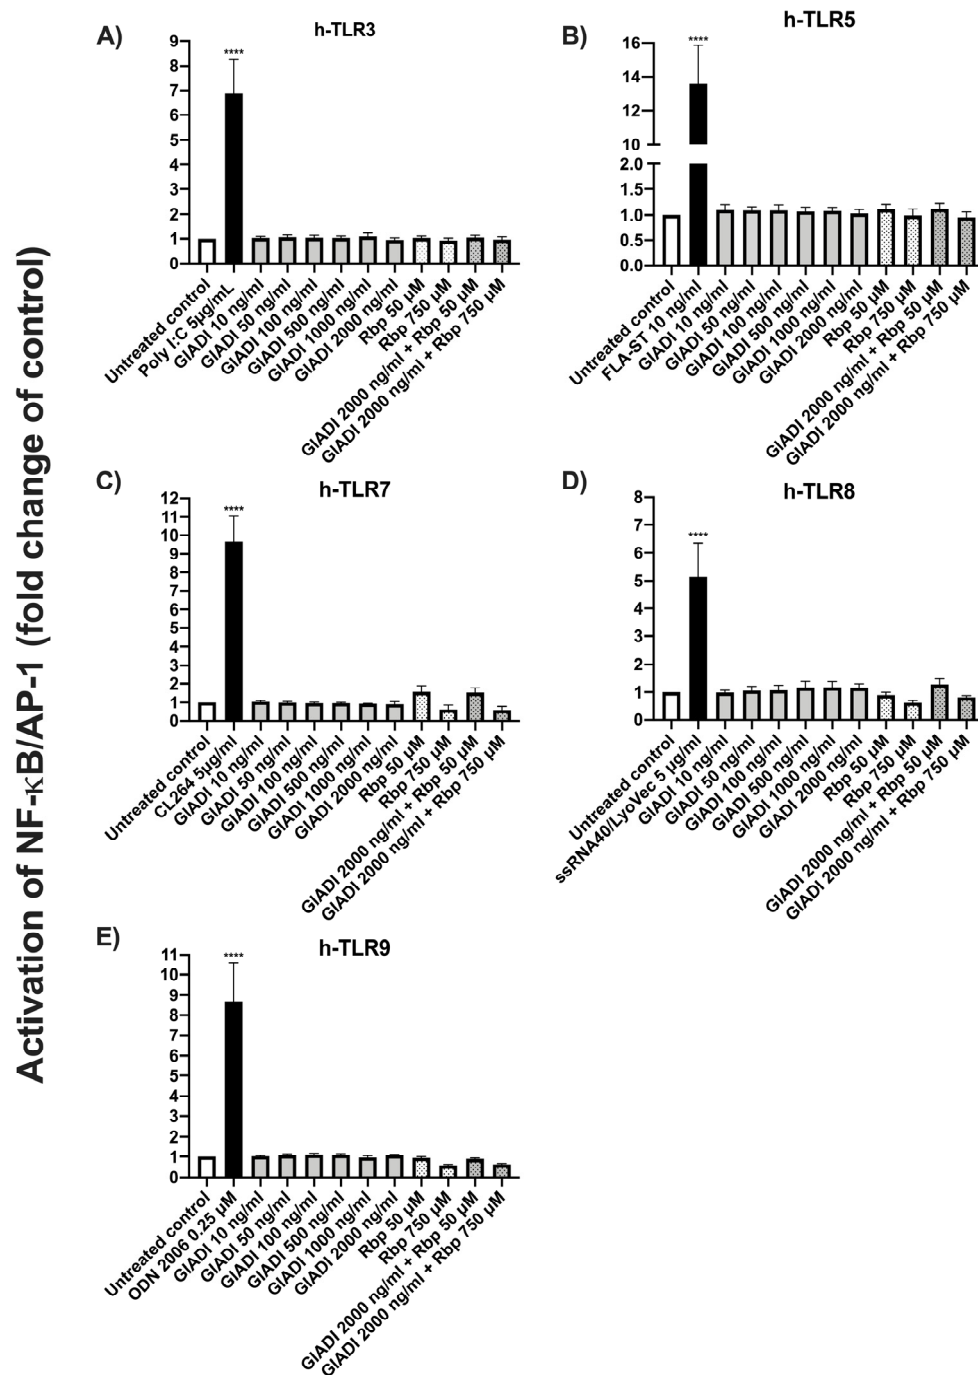

**Figure S1:** Effects of GIADI on the activation of human TLRs. Cells expressing (A) TLR 3, (B) TLR5, (C) TLR7, (D) TLR8, and (E) TLR9 were incubated for 24h with rising concentrations of GIADI, Rabeprazole (Rbp), or their combination. Afterward, NF- $\kappa$ B/AP-1 release was determined.
